1 **Postmating reproductive barriers contribute to the incipient sexual isolation of US and Caribbean**

2 ***Drosophila melanogaster***

3

4 **Joyce Y. Kao, Seana Lymer, Sea Hwang, Albert Sung, Sergey V. Nuzhdin**

5 Section of Molecular and Computational Biology, Department of Biology, University of Southern

6 California, Los Angeles, CA 90089, USA

7

8 Contact Information:

9 Joyce Kao ([joycekao@usc.edu](mailto:joycekao@usc.edu)), Sergey Nuzhdin ([snuzhdin@usc.edu](mailto:snuzhdin@usc.edu)) . 1050 Childs Way, Los

10 Angeles, CA, USA 90089-2910. Telephone: (+1) 213-740-3065

11 **Abstract**

12 The nascent stages of speciation start with the emergence of sexual isolation. Understanding  
13 how reproductive barriers influence this evolutionary process is an ongoing effort. We present  
14 here a study of *Drosophila melanogaster* populations from the southeast United States and  
15 Caribbean islands undergoing incipient sexual isolation. The existence of premating  
16 reproductive barriers have been previously established, but they do not fully account for the  
17 degree of isolation present. To assess the influence of postmating barriers, we investigated  
18 putative postmating barriers of female remating and egg laying behavior, as well as hatchability  
19 of eggs laid and female longevity after mating. While we did not find any effects in female  
20 remating or egg laying, we did observe lower hatchability in the central region of our  
21 geographical spread as well as shorten female life spans after mating to genetically different  
22 males in females originating from the northern- and southernmost locations of those surveyed.  
23 These results serve as evidence that long-term consequences after mating such as the fitness  
24 of offspring and shortened lifespan have a stronger effect than short-term postmating behaviors.

25

26 **Running Title:**

27 **Postmating barriers in US and Caribbean fruit flies**

28

29 **Key Words**

30 **sexual conflict, egg laying, hatchability, remating, sperm toxicity, chase away selection**

31

32 **Introduction**

33 Males and females in sexual mating systems ultimately have different reproductive interests and this  
34 interaction of contrasting interests is commonly referred to as sexual conflict (Chapman et al. 2003;  
35 Parker 1979). Competitive males are selected to override the mating preferences evolved by females  
36 (Holland and Rice 1998). Females consequently evolve resistance to male 'coercion' tactics, and males  
37 are then selected by novel or more exaggerated traits - perpetuating an endless evolutionary chase  
38 between the sexes (Arbuthnott et al. 2014; Parker 1979; Civetta and Singh 1995; Rice 1996; Chapman et  
39 al. 2003; Arnqvist and Rowe 2005). This phenomenon of conflict in reproductive optima has been  
40 experimentally demonstrated to promote an antagonistic male-female coevolution that is the essence of  
41 sexual isolation which precedes speciation (Chapman et al. 2003; Parker 1979; Holland and Rice 1998).

42

43 The tempo and mode by which new species are formed are influenced by the development of  
44 reproductive barriers, which facilitate reproductive isolation. When multiple barriers accumulate, gene flow  
45 is reduced between or within a given population, which can give rise to early stages of speciation. These  
46 reproductive barriers are traditionally classified as those occurring before fertilization, prezygotic, and  
47 those occurring after fertilization, postzygotic (Coyne and Orr 2004). The latter can be further broken  
48 down into extrinsic and intrinsic depending on if the barrier interacts with external factors (i.e.  
49 environmental, individuals) or internal factors (i.e. genetic incompatibilities) (Seehausen et al., 2014).  
50 Speciation involves multiple reproductive barriers of varying effect sizes (Coyne and Orr 2004,  
51 Seehausen et al., 2014), and identifying the interactivity and varying strengths of reproductive barriers at  
52 play is vital to characterizing the process of speciation.

53

54 Flies from the *Drosophila* genus are particularly suited to study the rise and fall of reproductive barriers  
55 since the range of study systems span the whole speciation spectrum from completely non-interbreeding  
56 species to hybridizing species (Bono and Markow, 2009), as well as species experiencing sexual isolation  
57 within itself (Yukilevich and True, 2008b). Empirical studies investigating sexual selection in *D.*  
58 *melanogaster* have been conducted about the evolution of prezygotic isolation - mate choice, male  
59 morphology, and courtship behavior (Yukilevich and True 2008a; Hollocher 1997). It has been suggested

60 that pre-mating barriers are of greater strength (Cozzolino and Scopece 2008; Coyne and Orr 1989;  
61 Ramsey *et al.* 2003; Coyne and Orr 2004). Postzygotic barrier mechanisms have also been known to  
62 have an influence in several systems of *Drosophila* flies, but has mostly been studied in hybridizing  
63 species such as *D. mojavensis/D. arizonae* (Bono and Markow, 2009) and *D. melanogaster/D. simulans*  
64 (Matute *et al.*, 2014). The emergence of postzygotic barriers within a single species has been somewhat  
65 less investigated. However, the current knowledge of postmating consequences in *Drosophila*  
66 *melanogaster* suggests that this species is a good model to investigate emerging postmating reproductive  
67 barriers.

68  
69 Male sperm transferred after mating contain accessory gland proteins reduce female remating rates and  
70 increase egg laying (Chapman *et al.* 2003; Wolfner, 1997). Reduced receptivity to remating will also  
71 decrease the female opportunity to mate with another male that may result in more fit progeny. Increased  
72 egg laying and the trauma from mating reduces female lifespan (Fowler and Partridge 1989). It is even  
73 suggested that male sperm is toxic to females (Rice 1996). As a result, females develop resistance to  
74 these harmful male traits, and males subsequently evolve new methods to discourage females from  
75 mating with other males (Arnqvist and Rowe 2005). It has been suggested that females should be more  
76 resistant to males they have co-evolved in with compared to males they have not coevolved with. These  
77 effects vary across populations, and ecological context appears to be a factor (Arbuthnott *et al.* 2014).  
78 This rapid, cyclical process termed sexually antagonistic coevolution has been demonstrated in not only  
79 *Drosophila* species (Knowles and Markow 2001) and water striders (Rowe *et al.* 2002), but also in many  
80 other animals. Coevolution by sexual conflict is a strong force behind reproductive isolation, which may  
81 lead to speciation in specific circumstances (Martin and Hosken 2003).

82  
83 Studying areas of where secondary contact where once genetically isolated, allopatric populations  
84 interbreed is a powerful approach to understanding the strength and dynamics of male-female postzygotic  
85 divergence (Jiggins and Mallet 2000). Of particular interest to this subject are the Caribbean islands and  
86 southeastern United States. This area is a secondary contact zone of west African and European *D.*  
87 *melanogaster* populations, which have evolved in allopatry for ~10,000-15,000 years (Capy *et al.* 1986).

88 Secondary contact occurred in two waves with west African flies migrating with the transatlantic slave  
89 trade 400-500 years ago to the Caribbean islands and the cosmopolitan flies arriving to the east coast US  
90 with European colonists <200 years ago (Capy et al., 1986; Duchen et al., 2013). It is known that in this  
91 species members of the African Zimbabwe population very rarely mate with individuals outside of this  
92 population, which are commonly referred to as 'cosmopolitan' (Hollocher et al. 1997). The contrasting  
93 natures of African and cosmopolitan flies are reflected in the Caribbean and southeast US flies  
94 respectively with partial mating isolation between west African flies and US cosmopolitan flies (Yukilevich  
95 and True 2008a). Previous authors have noted peculiar morphological, behavioral, and pheromonal  
96 differences in these North American populations where Caribbean populations display exceptional  
97 African-like morphology unlike those from the United States, which have retained cosmopolitan  
98 phenotypes from their European predecessors (Yukilevich and True 2008a; Capy et al. 1993; David and  
99 Capy 1988). Recent microsatellite evidence also indicates that United States flies are more genetically  
100 similar to African flies than are European flies, suggesting that African alleles may have introgressed into  
101 North America via the Caribbean islands (Duchen et al., 2013; Yukilevich and True 2008b; Caracristi and  
102 Schlotterer 2003; Capy *et al.* 1986) supporting the existence of a southeast US and Caribbean island  
103 'hybrid' zone between African and European populations. Only mating preferences and other  
104 premating/prezygotic reproductive barriers have been formally treated in this system (Yukilevich and True  
105 2008a; Yukilevich and True 2008b), and the presence of incipient postmating sexual isolation in  
106 Caribbean populations remain unexplored.

107  
108 We present our study as an effort to better understand the role of postmating reproductive barriers in a  
109 system of *Drosophila melanogaster* experiencing incipient sexual isolation. We have investigated the role  
110 of remating, female egg laying, hatchability of laid eggs, and female longevity after mating with different  
111 males as putative postmating reproductive barriers. These phenotypes are good candidates to investigate  
112 the scope of extrinsic and intrinsic postmating reproductive barriers. We measure each of these  
113 phenotypes in females from different locations in the southeast US and Caribbean islands and examine  
114 them for geographical patterns, which may reveal if and how these barriers affect this system of  
115 southeast United States and Caribbean Island *Drosophila melanogaster*.

116

## 117 **Materials and Methodology**

### 118 *Fly Lines and Rearing Conditions*

119 For our phenotypic assays, we used 23 isofemale lines of *Drosophila melanogaster* collected in the  
120 summer of 2004 and 2005 (Yukilevich and True 2008). Origins are as following (TABLE 1; FIGURE 1):  
121 Birmingham, AL (lines 1-1 and 1-2); Selba, AL (lines 2-1 and 2-2); Thomasville, GA (lines 3-1 and 3-2);  
122 Meridian, MS (lines 4-1 and 4-2); Tampa Bay, FL (lines 5-1 and 5-2); Sebastian, FL (line 6-1); Freeport,  
123 Grand Bahamas-west (lines 7-1 and 7-2); Bullock’s Harbor, Berry Islands (lines 8-1 and 8-2); Cockburn  
124 Town, San Salvador (lines 9-1 and 9-2); George Town, Exumas (lines 10-1 and 10-2); Mayaguana,  
125 Mayaguana (lines 11-1 and 11-2); Port Au Prince, Haiti (lines 12-1 and 12-2). Original line ID numbers  
126 are listed in Supplemental Table 1. All flies were maintained at 25 °C in vials on a standard cornmeal diet  
127 (recipe available upon request) and entrained under a 12hr light:12hr dark regime.

128

| Map Number | Location                        | Line(s)       |
|------------|---------------------------------|---------------|
| 1          | Birmingham, AL                  | 1-1 and 1-2   |
| 2          | Selba, AL                       | 2-1 and 2-2   |
| 3          | Thomasville, GA                 | 3-1 and 3-2   |
| 4          | Meridian, MS                    | 4-1 and 4-2   |
| 5          | Tampa Bay, FL                   | 5-1 and 5-2   |
| 6          | Sebastian, FL                   | 6-1           |
| 7          | Freeport, Grand Bahamas - West  | 7-1 and 7-2   |
| 8          | Bullock’s Harbor, Berry Islands | 8-1 and 8-2   |
| 9          | Cockburn Town, San Salvador     | 9-1 and 9-2   |
| 10         | George Town, Exumas             | 10-1 and 10-2 |
| 11         | Mayaguana, Mayaguana            | 11-1 and 11-2 |
| 12         | Port Au Prince, Haiti           | 12-1 and 12-2 |

129 Table 1: Corresponding map locations and lines

130

131 *Egg laying, Hatchability, and Remating Rate Assays*

132 Virgin females were collected from all 23 isofemale lines. Male flies up to one day old were collected from  
133 two lines (lines 1-2 and 11-1) located at polar ends of our geographical study region. We chose these two  
134 lines as sources for male flies based on clinal distance as well as maximal differences between courtship  
135 profiles and physical characteristics (Yukilevich and True 2008b) to account for female mate preference  
136 which has been previously established (Yukilevich and True 2008a). All flies were collected on light CO<sub>2</sub>  
137 anesthesia and aged for three to four days before entering our assays. We set up a full factorial  
138 experiment where females from each of the isofemale lines were crossed with the two lines from which  
139 males were collected. Each cross was replicated 15 times.

140  
141 All flies were live manipulated using aspirators for the remainder of the phenotypic assays to avoid any  
142 physiological and behavioral effects of CO<sub>2</sub> anesthesia (Badre *et al.* 2005). Assays lasted 24 days and  
143 were conducted in two stages. The first stage measured female remating rates and egg laying rates over  
144 a 10-day period; during the following 14 days, second stage quantified hatchability rates. In the first stage  
145 (i.e. first 10 days), females were transferred daily by aspirator into new vials with standard cornmeal fly  
146 food and blue food coloring. The dye helped visualize eggs laid by females without causing any variability  
147 in their behavior (Bergland 2012). The vials also had 20 uL of a 10% diluted active yeast mixture to  
148 stimulate females' reproductive activity. At lights on (i.e. dawn) on the initial day of the first stage,  
149 individual females were aspirated into a vial with two males from either one of the two selected male lines  
150 for mating. Approximately 90 minutes were allocated for copulation to occur, and all males were  
151 discarded immediately after this time period using an aspirator. Females that did not mate on the first day  
152 did not continue in the assay. Fecundity assays were conducted daily after the females were transferred  
153 into new vials. To assess short-term and long-term receptivity to remating effects, each individual female  
154 was introduced to two new males of the same genotype from her initial mating on the fourth and eighth  
155 day of the assay (i.e. three and seven days after initial mating). We allowed 90 minutes on both re-mating  
156 days for copulations to occur and all males were discarded via aspirator thereafter.

157  
158 On the first day of the second stage of the assay in order to ensure the quality of our phenotypic dataset,

159 female identities were checked to confirm correct sexing from when males were discarded from remating  
160 days. Incorrectly sexed vials in which the female - instead of the male - were accidentally discarded were  
161 not included in later analysis. Remaining vials that passed the first stage of the experiment were  
162 monitored daily for fly eclosion. Flies that eclosed were recorded and discarded immediately. Fly eclosion  
163 monitoring was terminated when either three consecutive days of zero fly eclosions or 14 days of  
164 monitoring was reached - whichever came first. All phenotyping assays during the first and second stages  
165 were conducted within the first three hours of lights on (i.e dawn). All flies from the first stage and eclosing  
166 vials in the second stage were incubated at a controlled 25 °C with a light timer set for a 12hr light: 12hr  
167 dark cycle.

168

#### 169 *Longevity Assays*

170 For our longevity assays, we phenotyped a subset of lines from the 23 isofemale lines that spanned the  
171 southeast United States and Caribbean Islands. Female flies used in our longevity assays originated from  
172 (arranged from north to south) Selba, Alabama, USA (line 2-2), Thomasville, Georgia, USA (line 3-1),  
173 Freeport, Grand Bahamas-west (line 7-2), Bullock's Harbor, Berry Islands (line 8-1), and Port Au Prince,  
174 Haiti (line 12-2). Representative 'American' and 'Caribbean' males were derived lines originating from the  
175 same male collection lines used in egg laying, hatchability, and remating assays, i.e. Birmingham,  
176 Alabama, USA (line 1-2) and Mayaguana, Mayaguana (line 11-1), respectively. 'Homotypic' crosses were  
177 defined as male and female both of either American or Caribbean origin. "Heterotypic" crosses were  
178 defined as male and female from different origins (i.e. American x Caribbean or Caribbean x American).  
179 Male and females from the same origin were assumed to be more related and genetically similar to each  
180 other than those from different origins based on previous evidence (Yukilevich and True 2008b).

181

182 Virgins females were collected on light CO<sub>2</sub> anesthesia and aged singly in vials for four days. Males were  
183 collected in the same manner and aged in groups of five per vial. We performed crosses in two separate  
184 rounds, which lasted approximately 70 and 80 days, respectively. In the first round, we crossed female  
185 flies from Selba, Alabama, USA and Port Au Prince, Haiti to either our representative 'American' male or  
186 'Caribbean' male. There were 50 replicates for each unique cross. Because of the large effect size from



187 our initial round, in the rest of our lines we had 25 replicates for each type of cross. In each round, aged  
188 female flies were placed with five male flies for 48 hours to ensure mating occurred. Male flies were  
189 discarded using an aspirator after the mating period. Female flies were then observed on a regular basis  
190 five days per week. Dates of deaths were recorded until the end of the 70 or 80-day observational period.  
191 The females were transferred to fresh vials every seven days.

192

### 193 *Post-mating behavior data analysis*

194 We examined the effects of geographic location on the total number of eggs laid by females, the total  
195 hatchability of those egg laid, and the propensity of females to remate three and seven days after initial  
196 mating. For egg laying and hatchability, we used a linear regression model with latitude and longitudinal  
197 coordinates as predictors as well as the male and female identity and phenotyping blocks to account for  
198 the variation from genotypes of male and females in addition to experimental block effects. Model fit and  
199 effects of factors was assessed with ANOVA tables produced by the models. Because remating was  
200 scored as a categorical variable of whether or not the female copulated on the two remating days, we  
201 used logistic regression models to assess the effects of geographic location while controlling for male and  
202 female genotypes and block effects on short- and long-term female receptivity to remating. The  
203 significance of longitudinal and latitudinal coordinates and model fits were assessed using analysis of  
204 deviance tables.

205

206 We performed a permutation test to investigate the significance of the lower hatchability rates in the three  
207 central locations as revealed by linear models as well as visual confirmation of plots. We calculated the  
208 difference in hatchability between the five lines from our three central locations and the hatchability of all  
209 other fly lines (18 lines). We then randomly assigned fly lines into groups of five and 18 and calculated the  
210 difference in hatchability between these two groups. These permutations were repeated 10,000 times. P-  
211 values were calculated by the number of times the difference in hatchability between these two groups  
212 were equal to or greater than our observed value divided by our 10,000 permutations. The line with the  
213 lowest hatchability was removed for a follow-up permutation test to confirm that the lower hatchability was  
214 only due to the effect of one line. Similar permutation tests was conducted on total egg counts to

215 determine that lower hatchability was also not due to lower egg counts. Hatchability of eggs laid by  
216 females mated to representative 'American' and 'Caribbean' males were performed separately, and P-  
217 values from these tests were corrected using the Bonferroni method.

218

219 All analysis was performed in R and the code for the permutation test is available upon request.

220

### 221 *Longevity data analysis*

222 Survival analysis is used for temporal data of waiting times to an event with censored data. We employed  
223 methods from survival analysis to examine our data. We analyzed the waiting times of female death after  
224 homotypic or heterotypic mating. Females that escaped or survived past our observational periods were  
225 considered censored data points. The first step of survival analysis is to estimate survival functions for  
226 each of our crosses,  $S(t)$ , which in our study is the probability of a female living longer than time,  $t$ . This  
227 can be done non-parametrically using the Kaplan-Meier method (Kleinbaum and Klein 2012). Parametric  
228 models were tested (i.e. exponential, log-normal, log-logistic, and generalized gamma), but none yielded  
229 a good fit (data not shown). After survival curves were fitted, we used it to estimate the cumulative hazard  
230 function,  $H(t)$ , for each type of cross. The cumulative hazard function shows the cumulative probability  
231 that a female has expired up to time,  $t$ . The relationship between the survival function and the cumulative  
232 hazard function is:

233

$$H(t) = -\ln(S(t))$$

234

235

or

236

$$S(t) = e^{-H(t)}$$

237

238 The most common statistical test used for comparing survival distributions is the log-rank test. However,  
239 this test has the proportional hazards assumption which requires that the hazard functions of the two  
240 groups being compared are parallel. Hazard functions for our comparisons of female longevity after

241 heterotypic and homotypic matings were plotted and visually checked for the crossing of hazard curves.  
242 When hazard curves cross, the proportional hazards assumption is violated so another test must be  
243 conducted because the standard log-rank test has little to no power (Klein and Moeschberger 1997). We  
244 chose to use a combined weighted log-rank test, which takes into account crossing hazard curves (Zhou  
245 et al., 2006). This improved log-rank test has more power than the standard log-rank tests when the  
246 hazard functions cross and the hazard ratio is not proportional.

247

248 All analysis was performed in R using the 'survival' package to estimate the survival curves and hazard  
249 functions. The package 'emplik' was used as part of the improved log-rank test where the R code can be  
250 obtained online (<http://www.ms.uky.edu/%7Emai/research/LogRank2006.pdf>).

251

## 252 **Results**

### 253 *Egg counts*

254 Egg counts for each line are shown using side-by-side box plots with locations arranged from the  
255 northernmost to the southernmost location, left to right (FIGURE 2A, 2B). It does not appear that egg  
256 counts follow a clinal pattern in either case of females mated to representative 'American' or 'Caribbean'  
257 males. There is much variation within lines, but the median egg count for each location is approximately  
258 the same except for in the case of females from location 6 (line 6-1; Sebastian, FL) when mated to  
259 Caribbean males (FIGURE 2B).

260

261 The full regression model showed that longitude and latitude were not significant influences ( $p = 0.3324$ )  
262 on egg laying and that most variance was accounted for by male ( $p < 0.001$ ) and female ( $p < 0.001$ )  
263 genotypes as well as block effects ( $p = 0.0018$ ). Comparing the full model with the reduced model in  
264 which longitude and latitude were omitted showed that the addition of longitude and latitude as predictive  
265 variable did not help the predictive power of the full model ( $p = 0.4994$ ). (SUPPLEMENTARY TABLE 2, 3,  
266 4)

267

### 268 *Remating*

269 Short- and long-term remating rates for each isofemale line were plotted against latitude and longitude  
270 coordinates (SUPPLEMENTARY FIGURE 1, 2). Short-term remating rates were generally lower (range of  
271 rates : 0-30%) than long-term remating rates (range of rates: 0-60%). Remating rates do not appear to be  
272 influenced by location, which was investigated further with logistic regression.

273

274 The full logistic regression model evaluating effects of latitude and longitude while controlling for male and  
275 female genotypes as well as block effects found that latitude ( $p = 0.11$ ) or longitude ( $p = 0.35$ ) were not  
276 useful in predicting short-term remating rates with similar results for long-term remating rates (lon  $p =$   
277  $0.7616$ , lat  $p = 0.6361$ ). Male genotype also was not a significant influence on short-term or long-term  
278 remating rates ( $p = 0.4848$  and  $p = 0.1240$ ). The reduced models removing latitude and longitude as  
279 predictors also showed that they were not significantly influencing remating rates. Female identities in  
280 both logistic models for short- and long- term remating rates were significant giving evidence that female  
281 genotypes could influence remating rates. However, when we fitted a model for long-term remating rates  
282 with a male x female interaction term, results showed that this interaction term was not significant ( $p =$   
283  $0.0959$ ). (SUPPLEMENTAL TABLE 5, 6, 7, 8, 9, 10, 11, 12)

284

### 285 *Hatchability*

286 Hatchability for the various locations in the southeast US and Caribbean Islands were visualized using  
287 side-by-side box plots with locations arranged from the northernmost to the southernmost location, left to  
288 right (FIGURE 2C, 2D). Hatchability in the three middle locations (location 4, 28, 33) at the border of the  
289 southeast US and Caribbean Islands appear lower than the locations on the edges in both the graphs  
290 displaying hatchability of females mated to American males (Figure 2C) and Caribbean males (Figure  
291 2D).

292 Our full linear regression model took into account male and female identities on hatchability as well as  
293 experimental block effects while assessing influences of longitude ( $p = 0.048$ ) and latitude. Longitude had  
294 a significant effect on hatchability ( $p = 0.0483$ ) while latitude did not ( $p = 0.2396$ ). However when we  
295 compare the reduced model with latitude removed with the full model, we find that latitude did help  
296 significantly in explaining hatchability ( $0.0302$ ). (TABLE 2, 3, 4)

297

298

|           | Df  | Sum Sq  | Mean Sq | F value | Pr(>F)    |
|-----------|-----|---------|---------|---------|-----------|
| Block     | 14  | 2.9337  | 0.20955 | 4.6414  | 4.007e-08 |
| Female    | 22  | 7.7220  | 0.35100 | 7.7745  | <2.2e-16  |
| Male      | 1   | 0.8869  | 0.88692 | 19.6448 | 1.084e-05 |
| Latitude  | 1   | 0.6255  | 0.06255 | 1.3856  | 0.23956   |
| Longitude | 1   | 0.17674 | 0.17674 | 3.9147  | 0.04826   |
| Residuals | 694 | 31.3326 | 0.04515 |         |           |

299 TABLE 2: ANOVA Table for Full Model of Hatchability

300

301

|           | Df   | Sum Sq  | Mean Sq | F value | Pr(>F)    |
|-----------|------|---------|---------|---------|-----------|
| Block     | 14   | 2.9337  | 0.20955 | 4.6168  | 4.557e-08 |
| Female    | 22   | 7.7220  | 0.35100 | 7.7332  | <2.2e-16  |
| Male      | 1    | 0.8869  | 0.88692 | 19.5403 | 1.143e-05 |
| Longitude | 1    | 0.0264  | 0.02639 | 0.5813  | 0.446     |
| Residuals | 6945 | 31.5455 | 0.04539 |         |           |

302 TABLE 3: ANOVA Table for Reduced Model of Hatchability with no Latitude

303

|      | Res Df | RSS    | DF | Sum of Sq | F | Pr(>F) |
|------|--------|--------|----|-----------|---|--------|
| Full | 694    | 31.333 |    |           |   |        |

|         |     |        |    |          |         |         |
|---------|-----|--------|----|----------|---------|---------|
| Reduced | 695 | 31.546 | -1 | -0.21291 | 4.47158 | 0.03022 |
|---------|-----|--------|----|----------|---------|---------|

304 TABLE 4: ANOVA table of model comparisons

305

306 To evaluate the significance of the dip in hatchability rates, we performed permutation tests as described  
307 in our methods section. We found that the hatchability in the middle three locations was significantly  
308 lower than the rates in the surrounding locations regardless of being mated to an American male ( $p <$   
309  $0.0001$ ) or Caribbean male ( $p < 0.0001$ ). Results were similar when the location with the lowest  
310 hatchability rate was removed (28: Sebastian, FL, USA) and the permutation tests performed again  
311 (females mated to American male:  $p = 0.0056$ , females mated to Caribbean male:  $p = 0.0272$ ). Similar  
312 tests were conducted on egg counts to investigate whether the lower hatchability was due to lower egg  
313 counts. No significant differences in egg counts between females from the middle locations and the outer  
314 locations were found regardless of whether they were mated to American males ( $p = 0.3192$ ) or  
315 Caribbean males ( $p = 0.7584$ ). The same results were yielded when we removed the influence of the  
316 middle location, 28: Sebastian, FL, USA, (mated to American males:  $p = 0.3016$ , mated to Caribbean  
317 males:  $p = 1.0$ ). These results suggest a generalizable central location effect on hatchability.

318

### 319 *Longevity*

320 Five female lines representing various locations in the Southeastern U.S. and Caribbean Islands were  
321 measured for longevity after experiencing homotypic or heterotypic matings. The homotypic cross survival  
322 curves for females from lines 3-1, 2-2, and 12-2 were consistently higher than the survival curves of  
323 females in heterotypic crosses (FIGURE 3, 4, 5). There were no apparent differences between homotypic  
324 and heterotypic survival curves of females originating from lines 7-2 or 8-1 (Figure 6, 7).

325

326 Hazard curves for all crosses and lines revealed non-proportional hazards in almost all cases of  
327 homotypic and heterotypic matings. (SUPPLEMENTARY FIGURE 3, 4, 5, 6, 7). Crossing points of all  
328 hazard functions were visually estimated for use in the improved log-rank tests (TABLE 5). The improved  
329 log-rank tests showed evidence that females after heterotypic matings had shorter lifespans than females  
330 in homotypic matings for females from lines 3-1 and 12-2 ( $p = 0.0410$  and  $p = 0.0271$ ). Females of line 2-

331 2 showed a reduced lifespan when involved in heterotypic matings (FIGURE 3), but these results were  
332 not significant ( $p = 0.3130$ ).

333

| Female line | T~approx time of crossing hazards | pvalue from improved log rank |
|-------------|-----------------------------------|-------------------------------|
| 13,34       | 37                                | 0.04096407                    |
| 40,23       | 42                                | 0.4246727                     |
| 33,11       | 40                                | 0.6260448                     |
| H,25        | 23                                | 0.02706502                    |
| 20,17       | 61                                | 0.3129819                     |

334 TABLE 2.5: Improved Log-rank Test Results

335

### 336 Discussion

337 Speciation is a complex process, dependent on a plethora of factors including diverse selectional forces  
338 and interactions with the environment. We examined several potential postmating reproductive barriers  
339 including remating rates, egg laying rates, hatchability, and female longevity that may potentially influence  
340 a system in the early stages of sexual isolation.

341 We observed an interesting hatchability rate 'valley' produced by the isofemale lines originating from our  
342 three central locations spanning the border of the United States and the Caribbean Island. This result  
343 may be evidence that there are essential genetic differences between American and Caribbean fly  
344 populations, which could have manifested as an intrinsic postzygotic barrier between these two  
345 populations. This type of evidence is indicative of the presence of Bateson-Dobzhansky-Muller  
346 incompatibilities (DMI) which are negative epistatic interactions and the most common form of intrinsic  
347 postzygotic isolation (Presgraves, 2010). A reduction in the fitness of 'hybrid' offspring here restricts the  
348 product of gene flow between American and Caribbean *D. melanogaster* populations. A more thorough  
349 investigation of these lines and genome sequences that are beyond the scope of this study are required  
350 to confirm the presence of DMIs.

351  
352 We examined female longevity postmating with males that were more or less genetically related to them  
353 as defined by physical distance. These results from the longevity assay were the inverse of our  
354 hatchability assays. Females originating from the central locations (i.e. location 7 and 8) did not seem as  
355 affected by heterotypic matings compared to females from the northern and southernmost locations (i.e.  
356 locations 2, 3, 12). Previous laboratory evolution studies indicate that females develop 'resistance'  
357 against males they coevolve with in the same environment (Arbuthnott et al. 2014). Our findings may  
358 support this theory in natural populations, however, due to the low number of lines we tested, our study is  
359 possibly lacking the power to appropriately detect the effects of this particular extrinsic postmating barrier.

360  
361 We did not find any evidence that egg laying rates or remating rates influenced the reproductive success  
362 in a systematic way with regard to these isofemale lines from the southeast United States and Caribbean  
363 Islands. However, the lack of evidence from our study does not imply that behaviors are not influential  
364 postmating reproductive barriers. Current views of speciation view the process as a sliding continuum  
365 where speciation can move forward or step back and may even be arrested at intermediate stages  
366 (Seehausen et al. 2014). Depending on the driving force of speciation, different types of reproductive  
367 barriers form at particular stages (Seehausen et al. 2014) thus it may be that postmating behaviors could  
368 be of importance at other stages in the speciation continuum in which case other species in the  
369 *Drosophila* genus may be better candidates to further investigate this question.

370  
371 While our findings contribute to the ever growing breadth of knowledge about sexual isolation and  
372 speciation, it also sheds light on the complexity of the interplay between different isolating mechanisms  
373 and genetic admixture. Overall our data suggests that long-term postmating consequences in terms of  
374 offspring fitness and female lifespan reduction are of greater influence in this particular incipient sexual  
375 isolation scenario when compared to short-term postmating behavioral responses such as egg laying and  
376 remating receptivity. We have also identified the border between the United States and Caribbean islands  
377 as a potential region where *D. melanogaster* populations are particularly admixed leading to interesting  
378 interactions between partial isolating mechanisms. Greater genetic admixture in flies originating from this



379 area could promote the lower hatchability of eggs laid by females from these populations if American and  
380 Caribbean flies are genetically distinct enough to increase the possibility of DMIs occurring. The same  
381 genetic admixture could also be contributing towards female hardiness against harm from mating with a  
382 wider range of genetically diverse males, which in turn can compensate for lower hatchability by  
383 increasing reproductive lifespan. Genome resequencing efforts of *D. melanogaster* individuals from this  
384 study system will help determine the amount of genetic mixing occurring in the southeast US and  
385 Caribbean islands.

386

### 387 **Literature Cited**

388

389 Arbuthnott, D., et al. 2014. The ecology of sexual conflict: ecologically dependent parallel evolution of  
390 male harm and female resistance in *Drosophila melanogaster*. *Ecology Letters*. 17(2): 221-228.

391

392 Arnqvist, G. and Rowe, L. 2005. *Sexual Conflict*. Princeton, NJ: Princeton University Press. Print.

393

394 Badre, N.H., et al. 2005. The physiological and behavioral effects of carbon dioxide on *Drosophila*  
395 *melanogaster* larvae. *Comp Biochem Physiol A Mol Integr Physiol*. 140(3): 363-376.

396

397 Bergland AO, et al. 2012. Fine-scale mapping of natural variation in fly fecundity identifies neuronal  
398 domain of expression and function of an aquaporin. *PLoS Genetics* 8(4): e1002631.

399

400 Bono, J. and Markow, T.A. 2009. Postzygotic isolation in cactophilic *Drosophila*: larval viability and life-  
401 history traits of *D. mojavensis*/*D. arizonae* hybrids. *Journal of Evolutionary Biology* 22:1387-1395

402

403 Capy, P., et. al. 1993. Phenotypic and Genetic Variability of Morphometrical Traits in Natural Populations  
404 of *D. melanogaster* and *D. simulans*. *I. Genet. Sel. Evol.* 25:517-536.

405

- 406 Caracristi, G. and Schlötterer, C. 2003. Genetic Differentiation between American and European  
407 *Drosophila melanogaster* Populations could be Attributed to Admixture of African Alleles. *Mol Biol Evol.*  
408 20(5): 792-799.
- 409
- 410 Chapman, T., et al. 2003. The sex peptide of *Drosophila melanogaster*: Female post-mating responses  
411 analyzed by using RNA interference. *PNAS.* 100(17): 9923-9928.
- 412
- 413 Civetta, A. and Singh, R. 1995. High divergence of reproductive tract proteins and their association with  
414 postzygotic reproductive isolation in *Drosophila melanogaster* and *Drosophila virilis* group species. *J. Mol*  
415 *Evol.* 41(6): 1085-1095.
- 416
- 417 Coyne, J.A. and Orr, H.A. 1989. Patterns of Speciation in *Drosophila*. *Evolution.* 43(2): 362-381.
- 418
- 419 Coyne, J.A. and Orr, H.A. 2004. *Speciation*. Sunderland, MA: Sinauer Associates. Print.
- 420
- 421 Cozzolino, S. and Scopece, G. 2008. Specificity in pollination and consequences for postmating  
422 reproductive isolation in deceptive Mediterranean orchids. *Philos Trans R Soc Lond B Biol Sci.*  
423 363(1506): 3037-3046.
- 424
- 425 David, J.R. and Capy, P. 1988. Genetic Variation of *Drosophila melanogaster* Natural Populations.  
426 *Trends Genet.* 4(4): 106-111.
- 427
- 428 Duchen P., et al. 2013. Demographic Inference reveals African and European admixture in the North  
429 American *Drosophila melanogaster* population. *Genetics.* 193(1): 291-301.
- 430
- 431 Fowler, K. and Partridge, L.. 1989. A cost of mating in female fruit flies. *Nature.* 338(6218): 760-761.

432

433 Holland, B. and Rice, W.R. 1998. Perspective: chase-away sexual selection: antagonistic seduction  
434 versus resistance. *Evolution* 52: 1-7.

435

436 Hollocher H., et al. 1997. Incipient Speciation by Sexual Isolation in *Drosophila melanogaster*: Variation in  
437 Mating Preference and Correlation Between Sexes. *Evolution*. 51(4): 1175-1181.

438

439 Jiggins, C.D. and Mallet, J. 2000. Bimodal hybrid zones and speciation. *Trends in Ecology and Evolution*  
440 15: 250-255.

441

442 Johnstone R.A. and Keller, L. 2000. How Males Can Gain by Harming Their Mates: Sexual Conflict,  
443 Seminal Toxins, and the Cost of Mating. *American Naturalist*. 156(4): 368-377.

444

445 Klein, J.P. and Moeschberger, M.L. 1997. *Survival Analysis*. New York: Springer. Print.

446

447 Kleinbaum, D.G. and Klein, M. 2012. *Survival Analysis*. New York: Springer. Print.

448

449 Martin O.Y. and Hosken, D.J. 2003. The evolution of reproductive isolation through sexual conflict.  
450 *Nature*. 423(6943): 979-982.

451

452 Powell JR. Progress and Prospects in Evolutionary Biology : The *Drosophila* Model. Oxford University  
453 Press; 1997.

454

455 Presgraves, D.C. 2010. The molecular evolutionary basis of species formation. *Nature Reviews Genetics*.  
456 11: 175-180.

457

458 Ramsey, J., et. al. 2003. Components of Reproductive Isolation between the Monkeyflowers *Mimulus*

- 459 Lewisii and *M. Cardinalis* (Phrymaceae). *Evolution* 57(7): 1520-1534.
- 460
- 461 Rice, W.R. 1996. Sexually antagonistic male adaptation triggered by experimental arrest of female  
462 evolution. *Nature* 381: 232-234.
- 463
- 464 Rowe L. and Arnqvist, G. 2002. Sexually antagonistic coevolution in a mating system: combining  
465 experimental and comparative approaches to address evolutionary processes. *Evolution*. 56(4): 754-767.
- 466
- 467 Rowe L., et al. 2003. Detecting sexually antagonistic coevolution with population crosses. *Proc Biol Sci*.  
468 270(1528): 2009-2016.
- 469
- 470 Seehausen, O., et. al. 2014. Genomics and the origin of species. *Nature Reviews Genetics* 15: 176-192.
- 471
- 472 Wolfner M.F. 1997. Tokens of love: Functions and regulation of *Drosophila* male accessory gland  
473 products. *Insect Biochem Mol Biol*. 27(3): 179-192.
- 474
- 475 Yukilevich R. and True, J.R. 2008. Incipient sexual isolation among cosmopolitan *Drosophila*  
476 *melanogaster* populations. *Evolution* (a) 62(8): 2112-2121.
- 477
- 478 Yukilevich R. and True, J.R. 2008. African Morphology, Behavior and Phermones Underlie Incipient  
479 Sexual Isolation between US and Caribbean *Drosophila melanogaster*. *Evolution* (b) 62(11): 2807-2828.
- 480
- 481 Zhou M, Bathke A, Kim M. 2006. Combined Multiple Testing by Censored Empirical Likelihood. Univ.  
482 Kentucky, Dept. of Statistics Tech Report.
- 483
- 484

485 **Figure Legends**

486 FIGURE 1: Map of locations used in postmating assays

487

488 FIGURE 2: Egg counts of females mated with A) American males and B) Caribbean males. Hatchability  
489 of females mated with C) American males and D) Caribbean males. Each box plot is a isofemale line  
490 arranged from the northernmost location (left) to the southernmost location (right)

491

492 FIGURE 3: Survival curves of females from line 2-2 after experiencing homotypic (solid line) or  
493 heterotypic (dashed line) matings

494

495 FIGURE 4: Survival curves of females from line 12-2 after experiencing homotypic (solid line) or  
496 heterotypic (dashed line) matings

497

498 FIGURE 5: Survival curves of females from line 3-1 after experiencing homotypic (solid line) or  
499 heterotypic (dashed line) matings

500

501 FIGURE 6: Survival curves of females from line 7-2 after experiencing homotypic (solid line) or  
502 heterotypic (dashed line) matings

503

504 FIGURE 7: Survival curves of females from line 8-1 after experiencing homotypic (solid line) or  
505 heterotypic (dashed line) matings

506

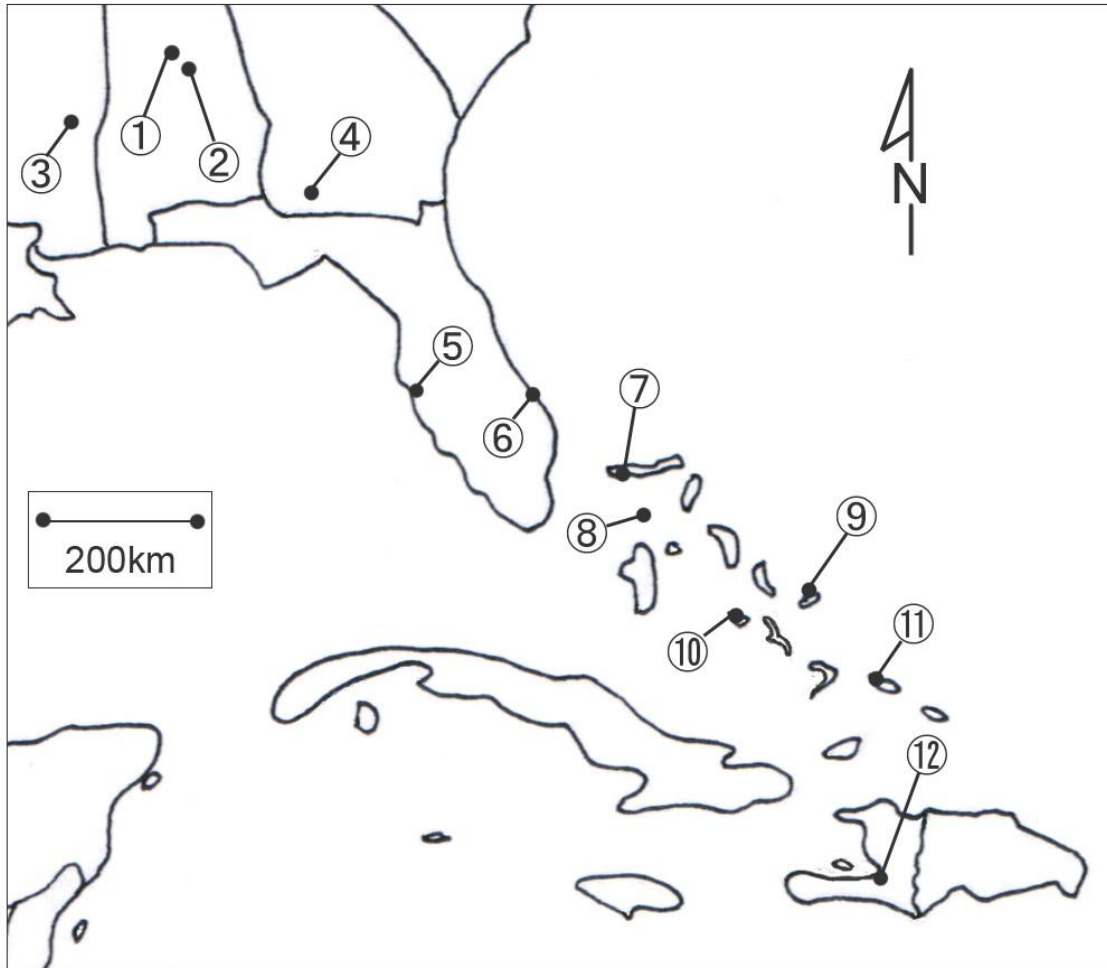

507

508 FIGURE1: Map of locations used in postmating assays

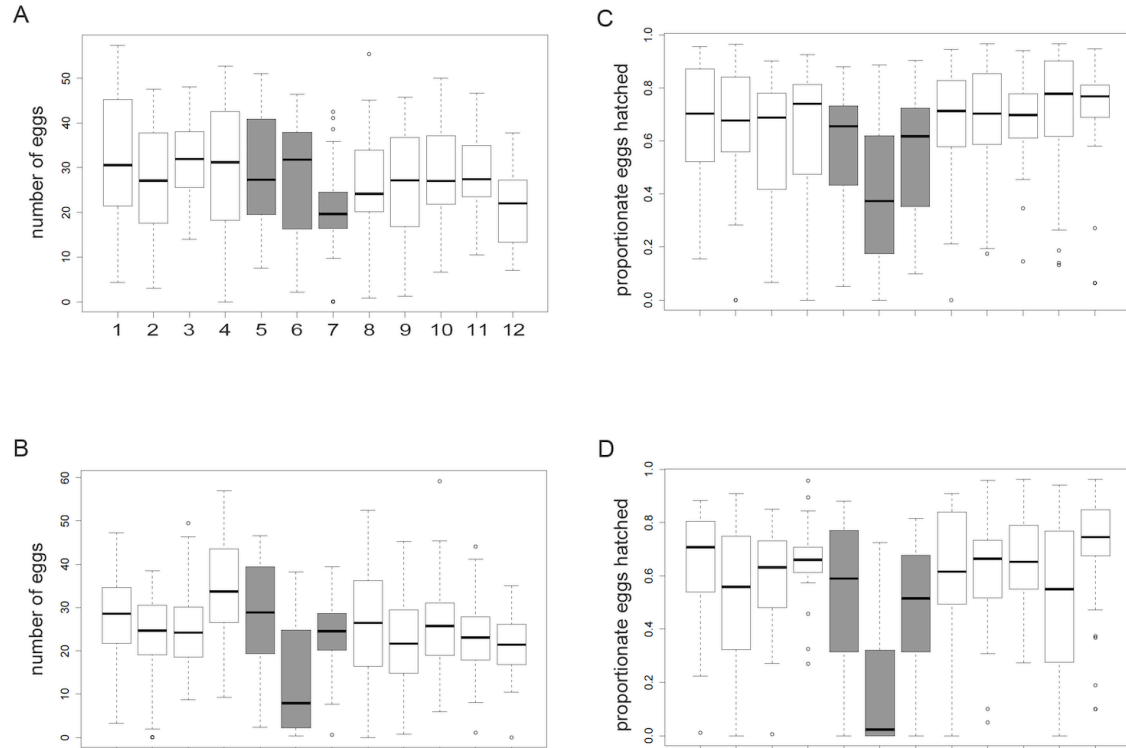

509

510 FIGURE 2: Egg counts of females mated with A) American males and B) Caribbean males. Hatchability

511 of females mated with C) American males and D) Caribbean males. Each box plot is a isofemale line

512 arranged from the northernmost location (left) to the southernmost location (right)

513

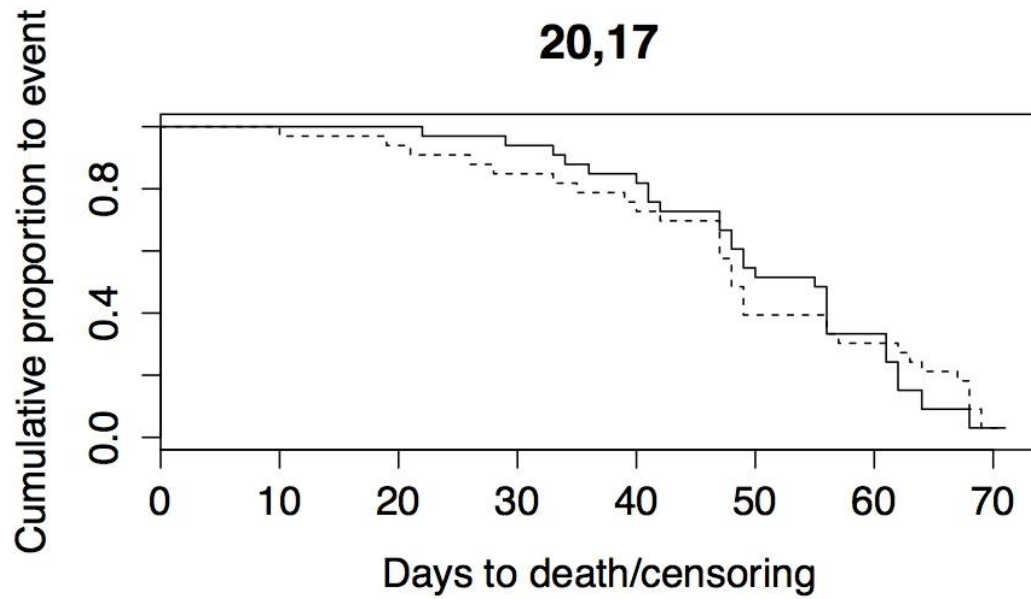

514

515 FIGURE 3: Survival curves of females from line 20,17 after experiencing homotypic (solid line) or  
516 heterotypic (dashed line) matings

517

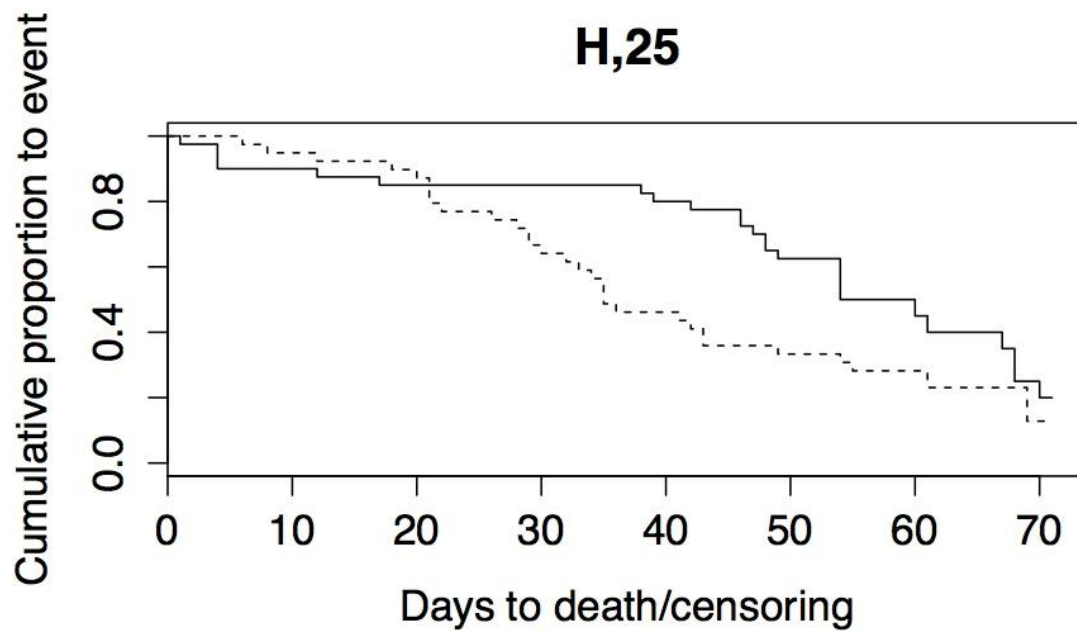

518

519 FIGURE 4: Survival curves of females from line H,25 after experiencing homotypic (solid line) or  
520 heterotypic (dashed line) matings

521



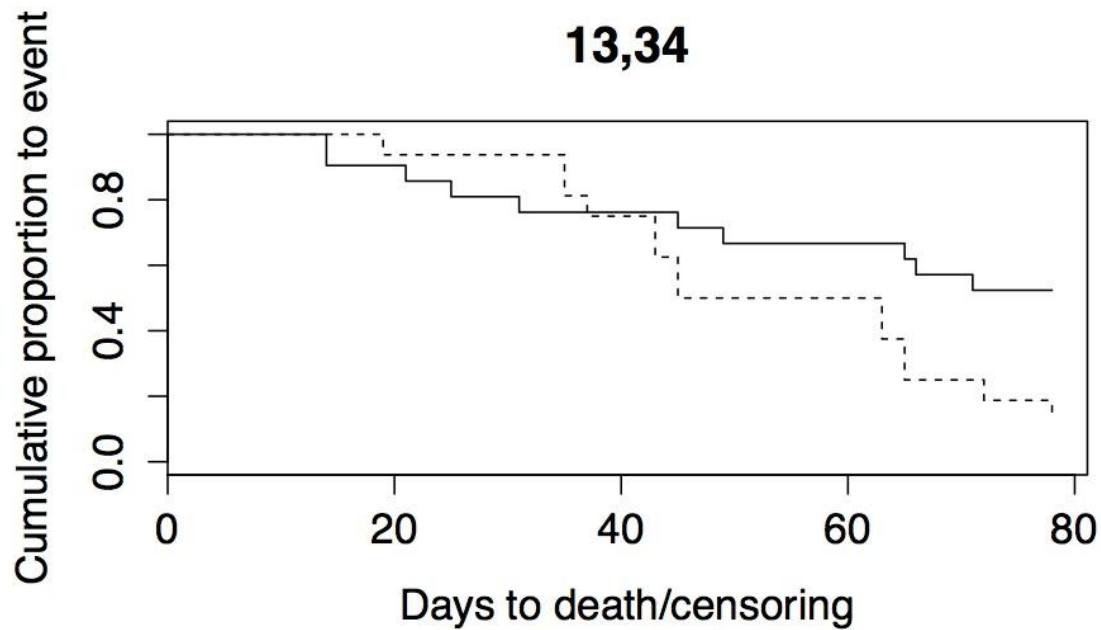

522  
523 FIGURE 5: Survival curves of females from line 13,34 after experiencing homotypic (solid line) or  
524 heterotypic (dashed line) matings

525

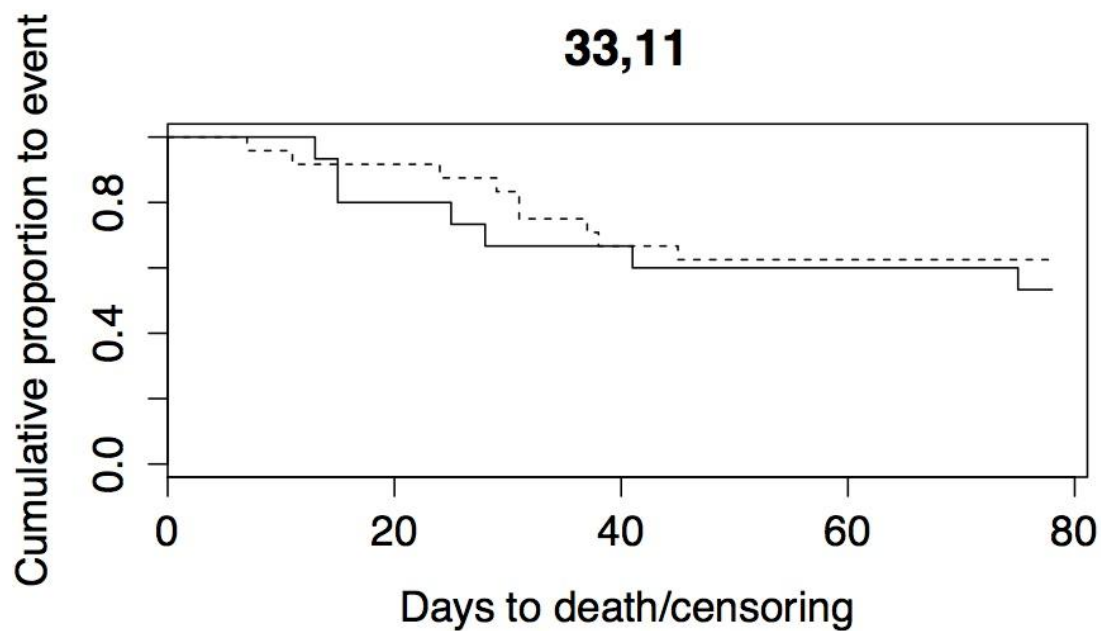

526  
527 FIGURE 6: Survival curves of females from line 33,11 after experiencing homotypic (solid line) or  
528 heterotypic (dashed line) matings

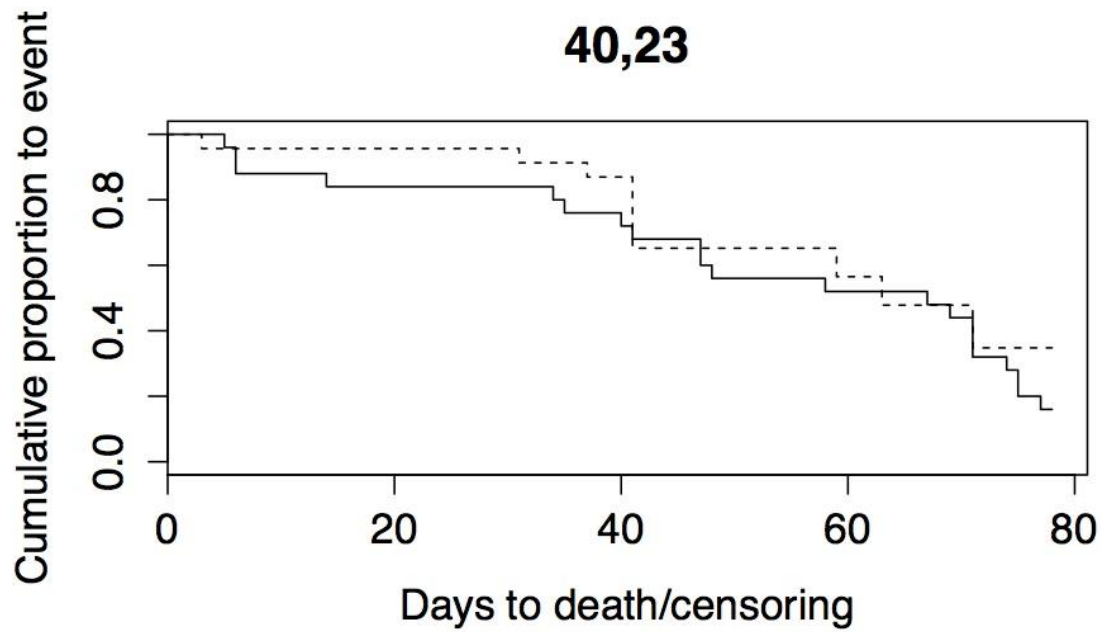

529  
530 FIGURE 7: Survival curves of females from line 40,23 after experiencing homotypic (solid line) or  
531 heterotypic (dashed line) matings
